# Supplementary material
Source: PubMed Central journal article supplement (PMC2885175)
Supplement: supp_M109.099846_jbc.M109.099846-1.pdf [file supp_M109.099846_jbc.M109.099846-1.pdf]

**Discovery of a Novel Function for Human Rad51:  
Maintenance of the Mitochondrial Genome**

**Jay M. Sage, Otto S. Gildemeister and Kendall L. Knight**

**Table of Contents - 1 Figure and accompanying legend**

---

**Supplemental Figure Legend**

FIGURE S1. **Production of H<sub>2</sub>O<sub>2</sub> by glucose oxidase.** Varying concentrations of GO were added to U2OS cells grown in DMEM and incubated at 37 °C for the indicated times. Hydrogen peroxide concentrations were assayed using a colorimetric-based kit and detected using a plate reader. Each data point represents the average of 8 experimental replicates.

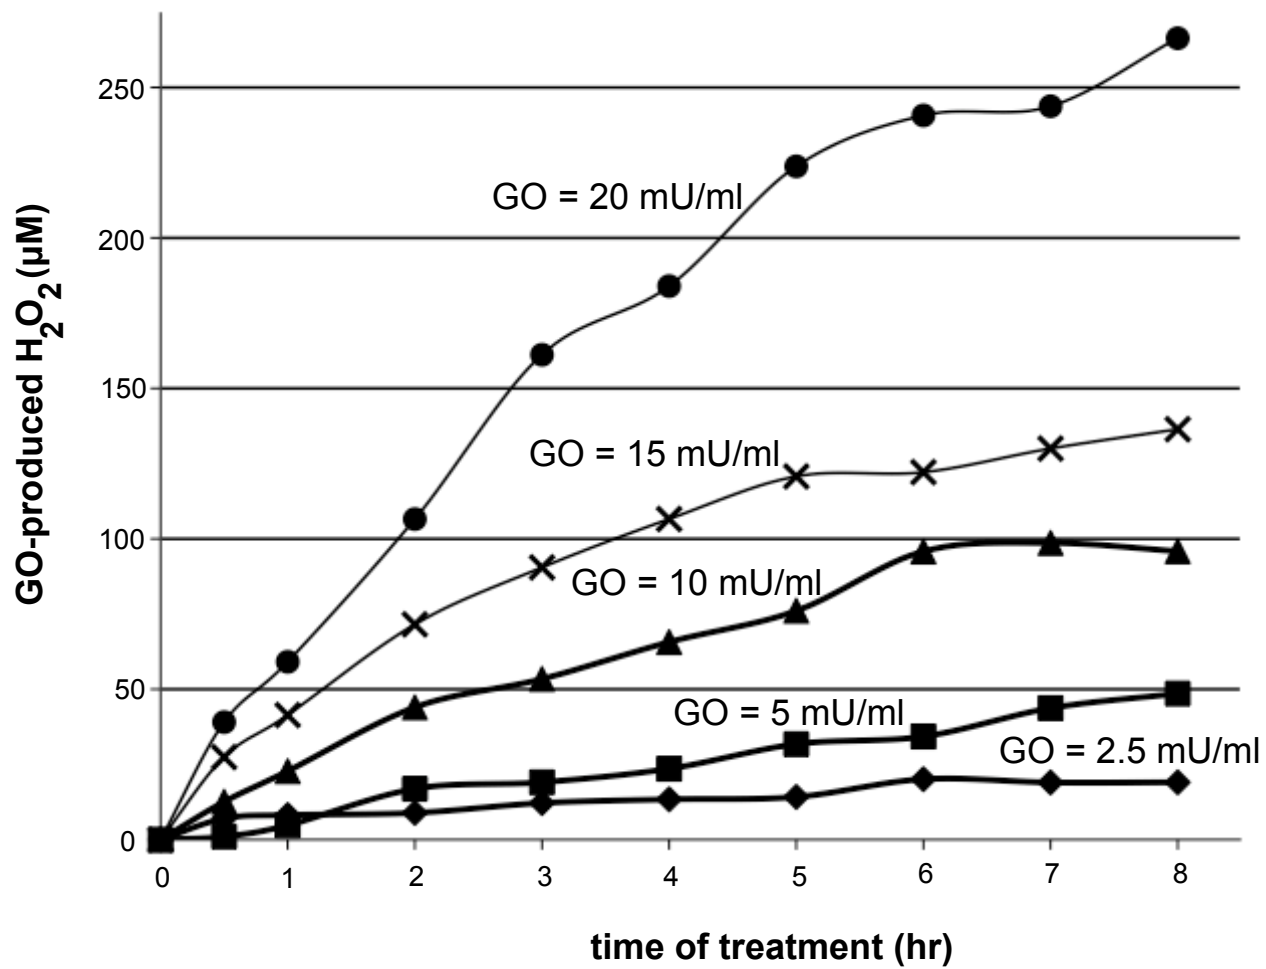

Figure S1
